# Supplementary material for: Oxytetracycline and Florfenicol Concentrations in Food-Additive Premixes Authorised for Broiler Chickens: Assessing Degree of Agreement with Manufacturers Labelling
Source: MDPI journal article supplement (doi:10.3390/ani11061797), 2021-06-16
Supplement: s1 [file s1]

Supplementary Materials

# Oxytetracycline and Florfenicol Concentrations in Food-Additive Premixes Authorised for Broiler Chickens: Assessing degree of agreement with manufacturers labelling.

Aldo Maddaleno, Matías Maturana, Ekaterina Pokrant, Betty San Martín and Javiera Cornejo.

**Table S1.** Configuration of chromatographic systems for Waters Xevo TQ-S micro and ABSciex API 4000 instruments.

| Configuration         | Oxytetracycline analysis                                             | Florfenicol Analysis               |
|-----------------------|----------------------------------------------------------------------|------------------------------------|
| Detector              | Waters XEVO TQ-S micro                                               | ABSciex API 4000                   |
| Analytical column     | Acquity™ C 18 3.5 µm, 5 × 1.1 mm                                     | Sunfire™ C 18 3.5 µm, 150 × 2.1 mm |
| Injection volume (µL) | 10                                                                   | 10                                 |
| Oven temperature (°C) | 36                                                                   | 35                                 |
| Flow (mL/min)         | 0,200                                                                | 0,250                              |
| Mobile phase A        | Ammonium formate in water 0.0002 M and formic acid 0,16% in water    | 0.1% Formic acid in water          |
| Mobile phase B        | Ammonium formate in water 0.0002 M and formic acid 0,16% in methanol | 0.1% Formic acid in methanol       |

**Table S2.** Mobile phases gradient for the analysis of oxytetracycline, 4-epi-oxytetracycline, florfenicol, and florfenicol amine.

| Time (min) | Waters XEVO TQ-S micro |             | ABSciex API 4000 |             |
|------------|------------------------|-------------|------------------|-------------|
|            | Phase A (%)            | Phase B (%) | Phase A (%)      | Phase B (%) |
| 0          | 85                     | 15          | 85               | 15          |
| 5          | 85                     | 15          | 85               | 15          |
| 5.1        | 60                     | 40          | 60               | 40          |
| 10         | 60                     | 40          | 60               | 40          |
| 10.1       | 10                     | 90          | 10               | 90          |
| 15         | 10                     | 90          | 10               | 90          |
| 16         | 85                     | 15          | 85               | 15          |
| 25         | 85                     | 15          | 85               | 15          |
